# Supplementary material for: Efficient capture of recombinant SARS-CoV-2 receptor-binding domain (RBD) with citrate-coated magnetic iron oxide nanoparticles
Source: Royal Society of Chemistry journal article supplement (doi:10.1039/d3nr01109g), 2023-01-01
Supplement: d3nr01109g1.pdf [file d3nr01109g1.pdf]

## Supporting information

### **Efficient capture of recombinant SARS-CoV-2 receptor-binding domain (RBD) with citrate-coated magnetic iron oxide nanoparticles**

David A. González-Martínez <sup>b,c</sup>, Gustavo González Ruíz <sup>a</sup>, Cesar Escalante-Bermúdez <sup>a,d</sup>, Judey Aymed García Artalejo <sup>a</sup>, Tania Gómez Peña <sup>a</sup>, José Alberto Gómez <sup>a</sup>, Eduardo González-Martínez <sup>c</sup>, Yadira Cazañas Quintana <sup>a</sup>, Thais Fundora Barrios <sup>a</sup>, Tays Hernández <sup>a</sup>, Roberto Carlos Varela Pérez <sup>a</sup>, Dayli Díaz Goire<sup>a</sup>, Diaselys Castro López <sup>a</sup>, Ingrid Ruíz Ramirez <sup>a</sup>, Carlos R. Díaz Águila <sup>e</sup> and Jose Moran-Mirabal <sup>c</sup>.

<sup>a</sup>Centro de Inmunología Molecular, calle 216 esq. 15, Atabey, Playa, 11600, La Habana, Cuba.

<sup>b</sup>Facultad de Química, Universidad de La Habana, Zapata y G, Plaza de la Revolución, 10400, La Habana, Cuba.

<sup>c</sup>Department of Chemistry and Chemical Biology, McMaster University, Hamilton, Canada.

<sup>d</sup>Laboratorio de Bioinorgánica, Departamento de Química General e Inorgánica, Facultad de Química, Universidad de La Habana, Zapata y G, Plaza de la Revolución, 10400, La Habana, Cuba.

<sup>e</sup>Centro de Biomateriales, Universidad de La Habana, Avenida Universidad entre G y Ronda, Plaza de la Revolución, 10400, La Habana, Cuba

\*Corresponding authors (These authors contributed equally).

E-mail addresses: daalegm96@gmail.com (D.A. González-Martínez), gustavog@cim.sld.cu (G. González Ruíz).

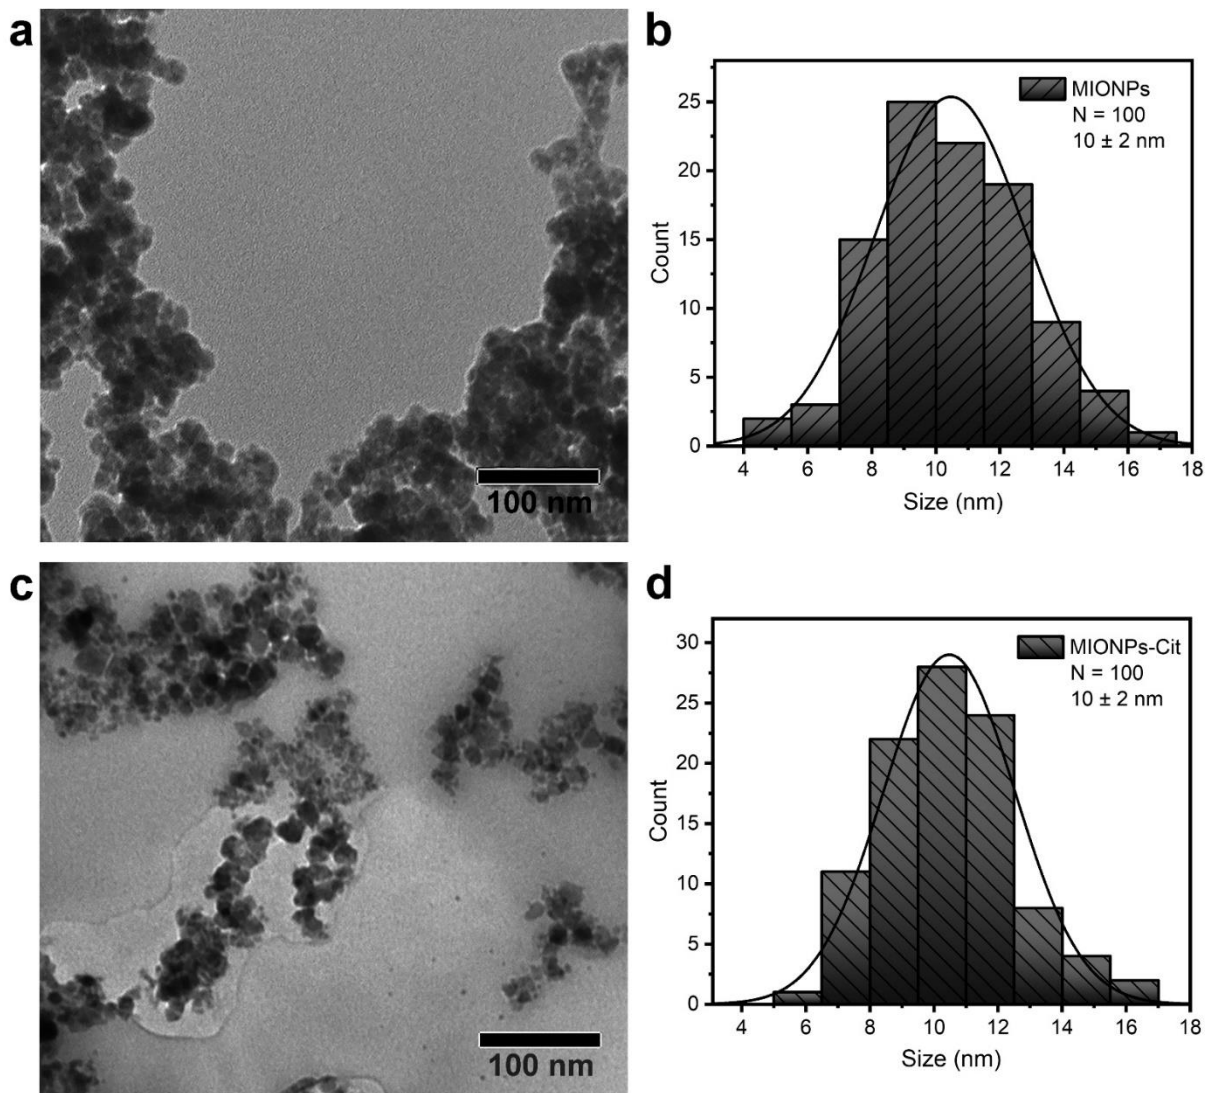

Figure S1: TEM images of (a) MIONPs and (b) MIONPs-Cit; and particles size distribution ((c) MIONPs and (d) MIONPs-Cit).

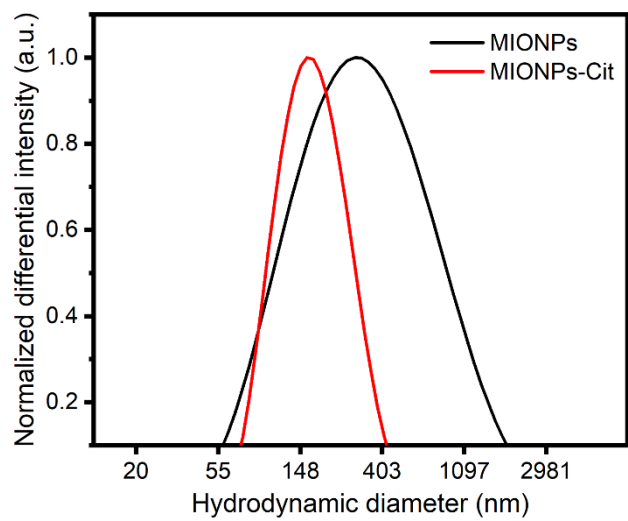

Figure S2: DLS profiles by intensity of MIONPs (black) and MIONPs-Cit (red).

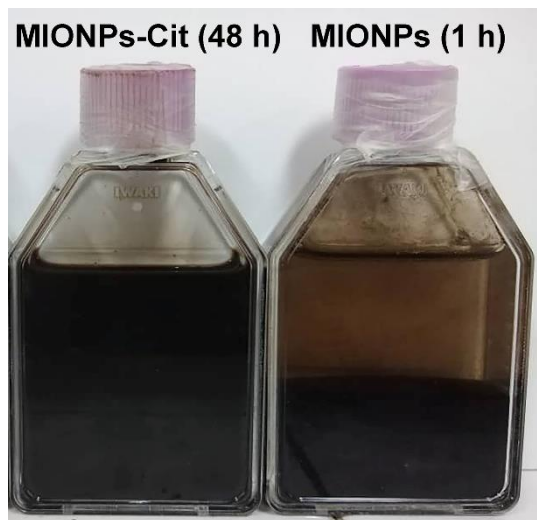

Figure S3: Photographs of MIONPs-Cit (left) after 48 h of coating and MIONPs (right) after 1 h of obtention.

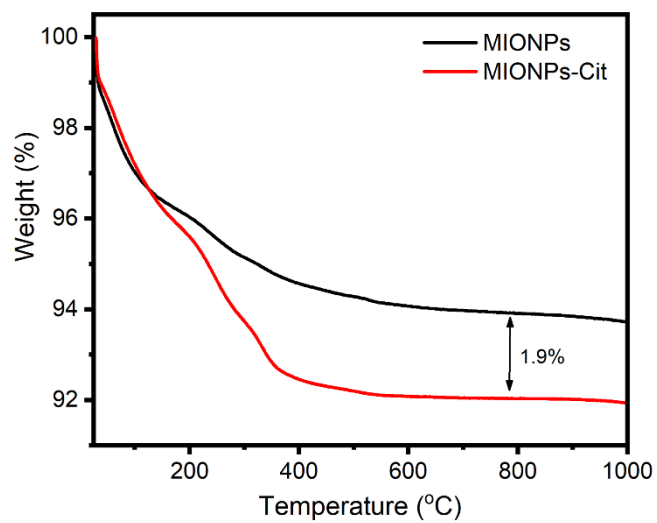

Figure S4: Thermogravimetric analysis of the MIONPs (black) and the MIONPs (red).

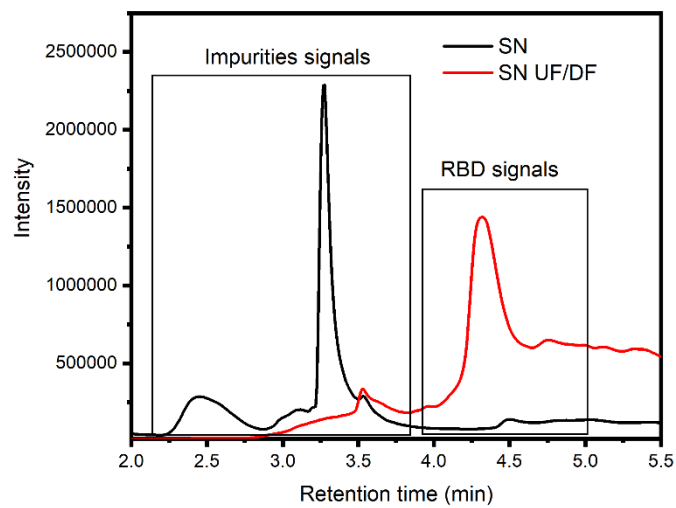

Figure S5: RP-HPLC chromatograms of the original supernatant and the SN UF/DF.

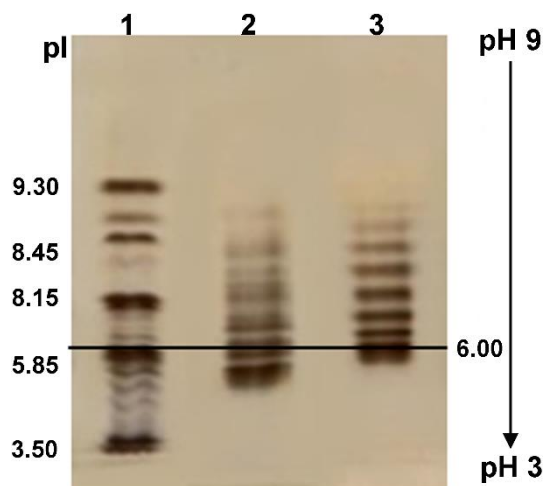

Figure S6: Isoelectric points of the monomeric (lane 2) and dimeric (lane 3) RBD. Lane 1 corresponds to Marker Broad range (pH 3-10) cat 17-0471-01.

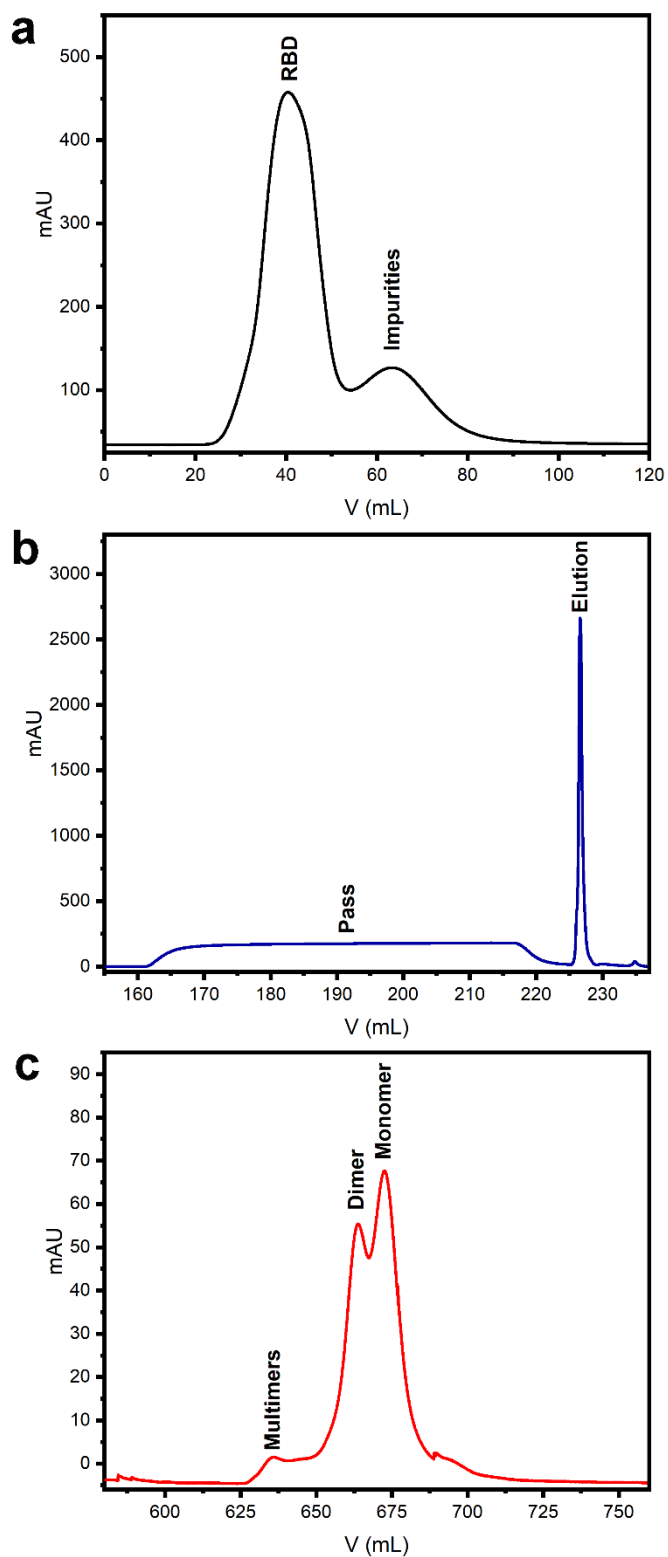

Figure S7: Purification process of the RBD obtained with MIONPs-Cit at the 50 mL scale. (a) Gel filtration chromatography with a Sephadex G-25 resin was used to exchange the desorbed RBD from the desorption buffer used in the capture step

with MIONPs-Cit to the adsorption buffer employed posteriorly in cationic exchange chromatography (b) HiTrap SP Sepharose HP cationic exchange chromatography. (c) Size exclusion chromatography using a Superdex resin.

Table S1: Mass balance of the process of RBD purification using MIONPs-Cit in the capture step.

|                    | Capture    | Buffer exchange | Cationic exchange | Molecular exclusion | Process    |
|--------------------|------------|-----------------|-------------------|---------------------|------------|
| Yield $\pm$ SD (%) | 68 $\pm$ 1 | 107 $\pm$ 2     | 66 $\pm$ 3        | 87 $\pm$ 5          | 42 $\pm$ 5 |

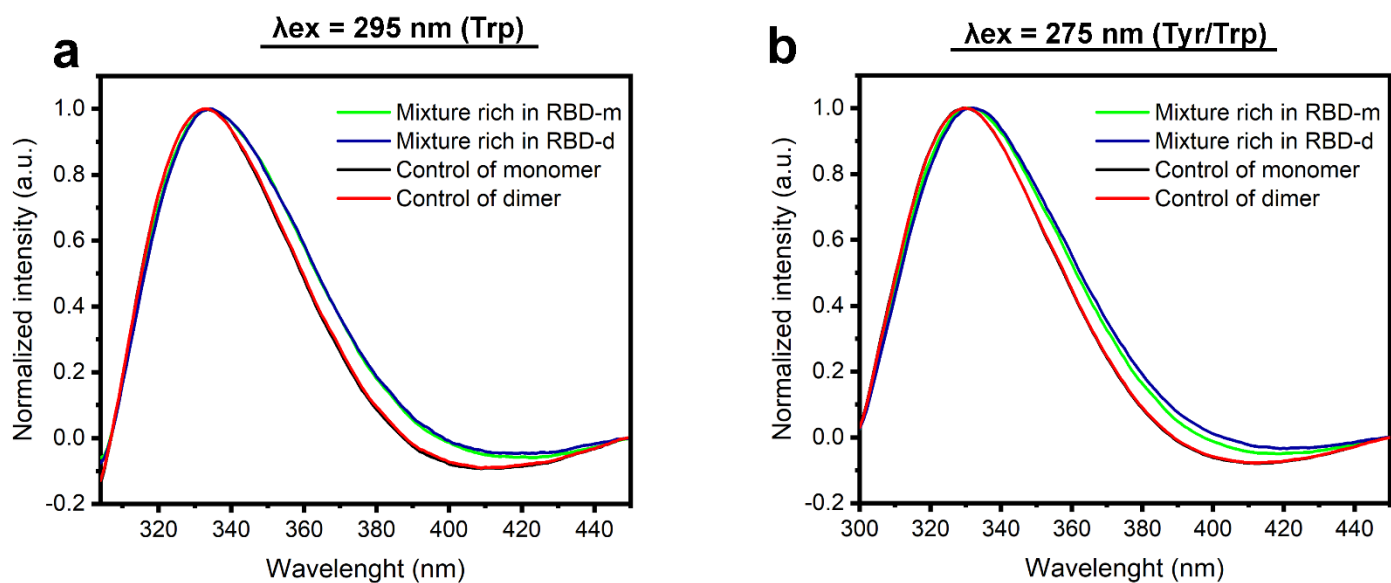

Figure S8: Fluorescence spectra of mixtures rich in monomer (green) and dimer (blue), a monomer control (black), and a dimer control (red). The spectra were obtained with an excitation wavelength of 295 nm for tryptophan (a) and 275 nm for tyrosine and tryptophan (b).

Table S2: Maximal emission wavelengths of the monomer, the dimer, and de corresponding controls, obtained with excitation wavelengths of 295 nm (Trp) and 275 nm (Tyr/Trp); and full width at half maximum (FWHM) obtained with excitation wavelengths of 295 nm.

| Sample                | Maximum emission wavelength (nm)      |                                           | FWHM ( $\lambda_{ex} = 295$ ) (nm) |
|-----------------------|---------------------------------------|-------------------------------------------|------------------------------------|
|                       | $\lambda_{ex} = 295 \text{ nm (Trp)}$ | $\lambda_{ex} = 275 \text{ nm (Tyr/Trp)}$ |                                    |
| Mixture rich in RBD-m | 334                                   | 332                                       | 47.3                               |
| Mixture rich in RBD-d | 334                                   | 331                                       | 47.2                               |

|                 |     |     |      |
|-----------------|-----|-----|------|
| Monomer control | 333 | 330 | 44.1 |
| Dimer control   | 333 | 329 | 43.9 |

---
